# Supplementary material for: Metal chalcogenide nanorings for temperature–strain dual-mode sensing
Source: Royal Society of Chemistry journal article supplement (doi:10.1039/d3nr05561b), 2024-01-01
Supplement: d3nr05561b1.pdf [file d3nr05561b1.pdf]

## **Metal chalcogenide nanorings for temperature-strain dual-mode sensing**

Xiaoshan Wang<sup>a,b,c</sup>, Jinhao Zhang<sup>a</sup>, Peiyuan Liu<sup>c</sup>, Danlin Wei<sup>b</sup>, Daobo Tian<sup>b</sup>, Shipeng Liu<sup>c</sup>, Qian Chen<sup>c</sup>, Jiacheng Cao<sup>c</sup>, Zhiwei Wang<sup>a,c</sup>, Xiao Huang<sup>a\*</sup>

<sup>a</sup> Institute of Advanced Materials (IAM), School of Flexible Electronics (SoFE), Nanjing Tech

University (NanjingTech), 30 South Puzhu Road, Nanjing 211816, China

<sup>b</sup> Ningxia Key Laboratory of Photovoltaic Materials, School of Materials and New Energy, Ningxia

University, Yinchuan 750021, China

<sup>c</sup> Frontiers Science Center for Flexible Electronics, Xi'an Institute of Flexible Electronics (IFE) and

Xi'an Institute of Biomedical Materials & Engineering, Northwestern Polytechnical University, 127

West Youyi Road, Xi'an 710072, China

\*Corresponding author. [iamxhuang@njtech.edu.cn](mailto:iamxhuang@njtech.edu.cn), [iamwhuang@nwpu.edu.cn](mailto:iamwhuang@nwpu.edu.cn)

## Characterization methods.

Scanning electron microscope (SEM, JEOL JSM-7800F, Japan), transmission electron microscope (TEM, JEOL 2100Plus, Japan), high resolution transmission electron microscope (HRTEM, JEOL 2100F, Japan) coupled with energy dispersive X-ray (EDX) spectroscopy were used to investigate the materials morphological, compositional, and structural features. X-ray diffraction (XRD, Rigaku SmartLab, Japan) and X-ray photoelectron spectroscopy (XPS, PHI 5000 VersaProbe, Japan) were performed to reveal the materials crystal phase and structure. Raman spectra (Horiba HR800, France) were obtained with a 532 nm laser. The metallic properties of the  $\text{Sn}_{0.2}\text{Mo}_{0.8}\text{S}_2$  nanorings were studied with a semiconductor characterization system (Keithley 4200).

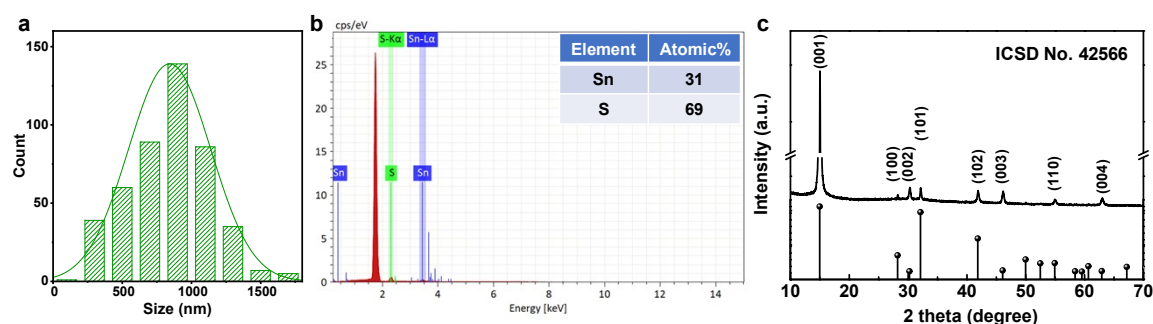

Fig. S1 EDX analysis (a) and XRD pattern (b) of SnS<sub>2</sub> nanoplates.

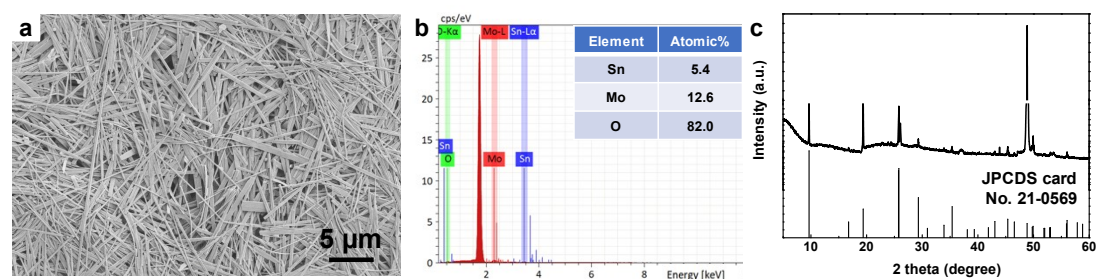

Fig. S2 SEM image (a), EDX analysis (b), and XRD pattern (c) of Sn<sub>0.3</sub>Mo<sub>0.7</sub>O<sub>3</sub> nanorods.

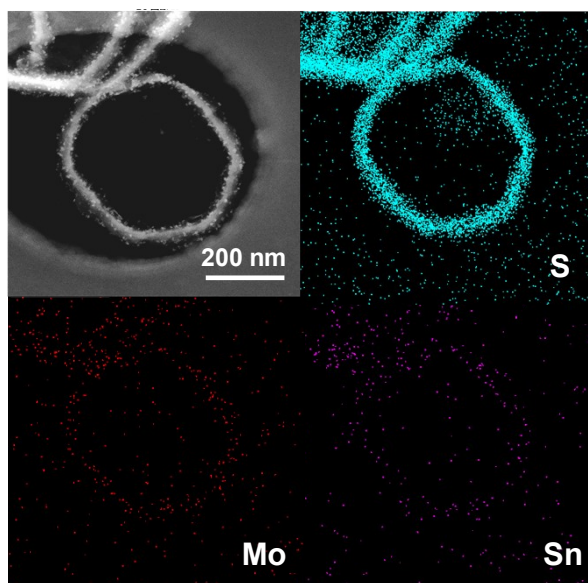

Fig. S3 STEM image and EDX mapping of  $\text{Sn}_{1-x}\text{Mo}_x\text{S}_2$  nanorings.

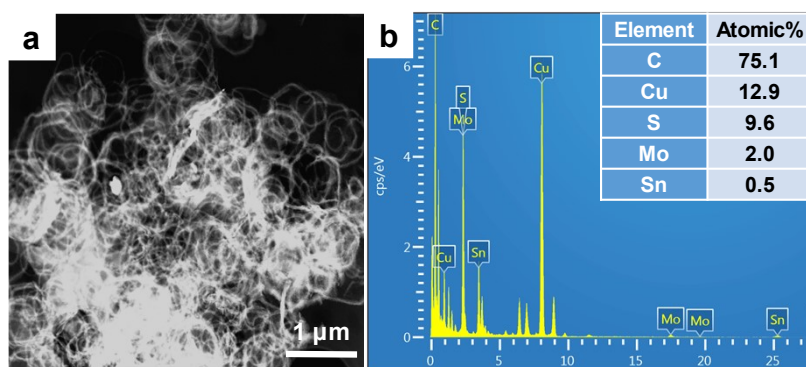

Fig. S4 STEM image (a) and EDX spectrum (b) of  $\text{Sn}_{0.2}\text{Mo}_{0.8}\text{S}_2$  nanorings. A mean value of  $\sim 0.8$  was determined for  $x$ .

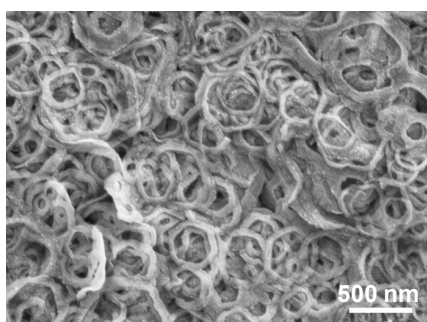

Fig. S5 The SEM images of  $\text{Sn}_{0.2}\text{Mo}_{0.8}\text{S}_2$  nanorings were synthesized 12 mg  $\text{Sn}_{0.3}\text{Mo}_{0.7}\text{O}_3$  as precursors.

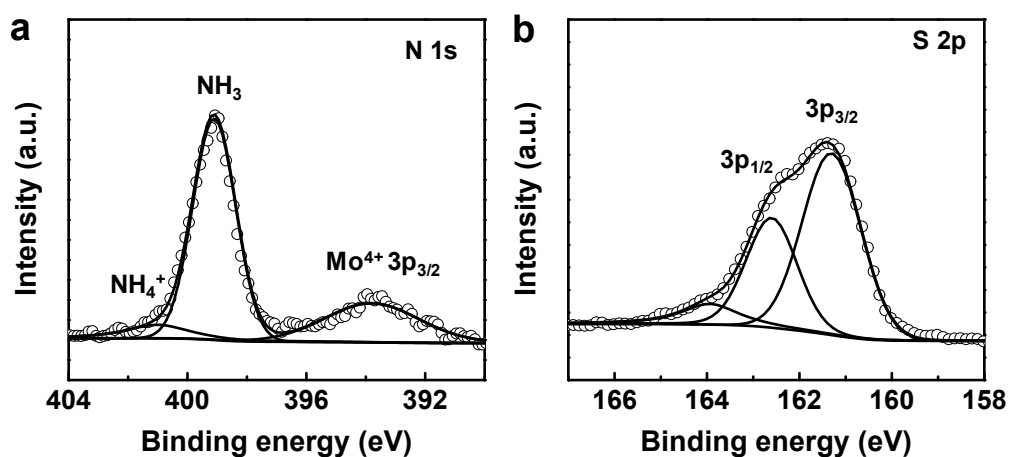

Fig. S6 XPS N 1s (a) and S 2p (b) spectra of  $\text{Sn}_{0.2}\text{Mo}_{0.8}\text{S}_2$  nanorings.

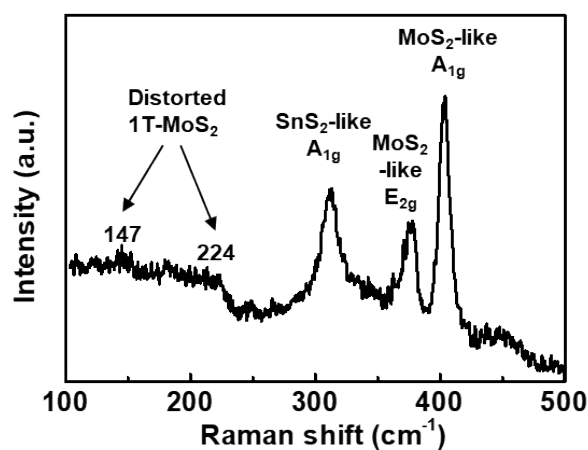

Fig. S7 Raman spectrum of  $\text{Sn}_{0.2}\text{Mo}_{0.8}\text{S}_2$  nanorings.

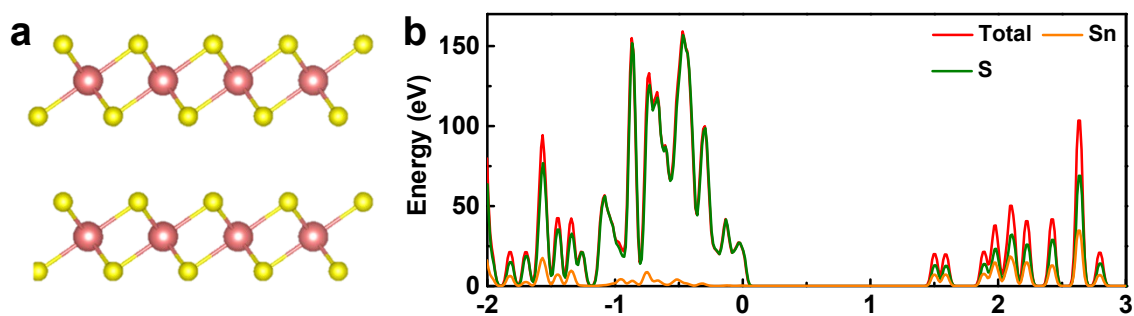

Fig. S8 Optimized crystal structure (a) and DOS (b) of a  $\text{SnS}_2$ , showing the semiconducting property. The Fermi level is assigned at 0 eV.

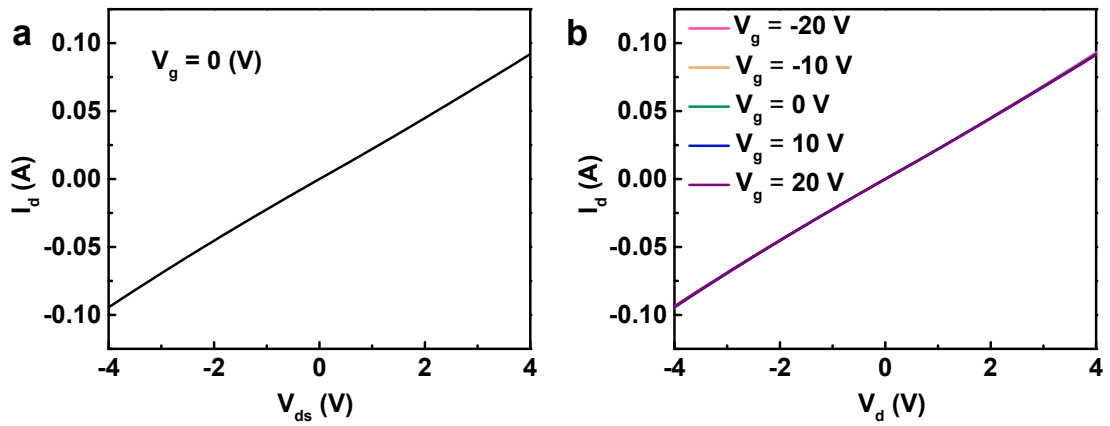

Fig. S9 Drain current ( $I_d$ ) characteristics of back-gated TFTs based  $\text{Sn}_{0.2}\text{Mo}_{0.8}\text{S}_2$  nanorings for drain-source voltages ( $V_{ds}$ ) varied from -4 to 4 V at 0 V gate voltage ( $V_g$ ). The  $I_d$ - $V_{ds}$  curves of  $\text{Sn}_{0.2}\text{Mo}_{0.8}\text{S}_2$  nanorings at varied  $V_g$  from -20 to 20 V.

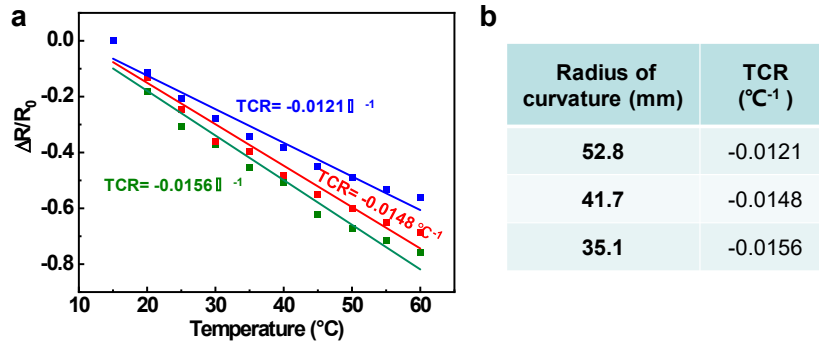

Fig. S10 (a) Calculation of temperature coefficient of resistance. (b) TCR of temperature sensors with different radius of curvature.

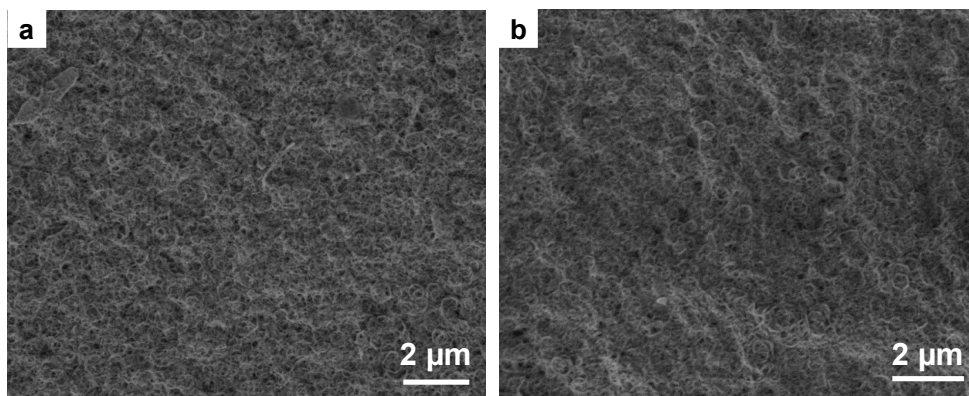

Fig. S11 The SEM images of  $\text{Sn}_{0.2}\text{Mo}_{0.8}\text{S}_2$  nanorings based strain sensor before (a) and after (b) 300 cyclic bending tests.

Table 1 Comparison of various inorganic materials-based thermoresistive temperature sensors.

| Material type         | Material                                                      | Fabrication method  | Temperature range (°C) | Sensitivity                | Stretchability         | Ref.      |
|-----------------------|---------------------------------------------------------------|---------------------|------------------------|----------------------------|------------------------|-----------|
|                       | Sn <sub>0.2</sub> Mo <sub>0.8</sub> S <sub>2</sub>            | inkjet printing     | 25-85                  | -0.013 °C <sup>-1</sup>    | flexible               | This work |
|                       | rGO fiber                                                     | wet spinning        | 30-80                  | -0.00636 °C <sup>-1</sup>  | flexible               | 1         |
|                       | rGO-PU/PDMS                                                   | wet spinning        | 25-50                  | -0.01185 °C <sup>-1</sup>  | 50%                    | 2         |
|                       | rGO film                                                      | spray coating       | 0-100                  | -                          | 3%                     | 3         |
|                       | graphene-(PEDOT:PSS)/PU                                       | inkjet printing     | 35-45                  | -0.0006 °C <sup>-1</sup>   | -                      | 4         |
|                       | rGO/parylene                                                  | spray coating       | 22-70                  | -0.0083 °C <sup>-1</sup>   | flexible               | 5         |
|                       | rGO/PET                                                       | spray coating       | 30-100                 | -0.006345 °C <sup>-1</sup> | flexible               | 6         |
|                       | PEI-rGO/polyimide                                             | Spray coating       | 25-45                  | -0.013 °C <sup>-1</sup>    | bending angle:40°      | 7         |
|                       | graphene/polyorganosiloxane aerogels                          | freeze drying       | 20-100                 | -                          | 80%                    | 8         |
| <b>Carbon</b>         | graphene nanoribbons                                          | writing or spraying | 30-80                  | -0.0127 °C <sup>-1</sup>   | curvature radius: 1 cm | 9         |
|                       | graphene/porous elastic polyurethane                          | dip coating         | 20-100                 | -0.00815 °C <sup>-1</sup>  | 50%                    | 10        |
|                       | rGO-Pu                                                        | spin coating        | -                      | 0.009 °C <sup>-1</sup>     | 70%                    | 11        |
|                       | CNT                                                           | printing            | 21-80                  | ~0.0025 °C <sup>-1</sup>   | flexible               | 12        |
|                       | graphene                                                      | CVD                 | -                      | 0.0042 °C <sup>-1</sup>    | 40%                    | 13        |
|                       | Ti <sub>3</sub> C <sub>2</sub> T <sub>x</sub> /cellulose      | vacuum filtration   | 27-140                 | ~0.00222 °C <sup>-1</sup>  | flexible               | 14        |
|                       | LIG/MXene-Ti <sub>3</sub> C <sub>2</sub> T <sub>x</sub> @EDOT | laser-induced       | 26-45                  | 0.0052 K <sup>-1</sup>     | flexible               | 15        |
| <b>metal nanowire</b> | Ag NWs                                                        | electrospinning     | 30-45                  | 0.0003 °C <sup>-1</sup>    | flexible               | 16        |
|                       | Ag NWs-PI                                                     | filtration          | -20-20                 | 0.0033 °C <sup>-1</sup>    | flexible               | 17        |
|                       | MoS <sub>2</sub>                                              | CVD                 | 27-120                 | 0.01-0.02 K <sup>-1</sup>  | flexible               | 18        |
|                       | MoS <sub>2</sub>                                              | -                   | -                      | 0.0057 K <sup>-1</sup>     | -                      | 19        |
| <b>semiconductor</b>  | MoTe <sub>2</sub>                                             | -                   | -                      | 0.0064 K <sup>-1</sup>     | -                      | 19        |
|                       | MoS <sub>2</sub> -graphene                                    | coating             | -                      | -                          | flexible               | 20        |
|                       | MoS <sub>2</sub>                                              | printing            | -                      | 0.0102 °C <sup>-1</sup>    | 80%                    | 21        |
|                       | MoS <sub>2</sub>                                              | inkjet printing     | 30-70                  | -0.0095 °C <sup>-1</sup>   | flexible               | 22        |

## Referance

- 1 T. Q. Trung, H. S. Le, T. M. L. Dang, S. Ju, S. Y. Park and N. E. Lee, *Adv. Healthc. Mater.*, 2018, **7**, e1800074.
- 2 T. Q. Trung, T. M. L. Dang, S. Ramasundaram, P. T. Toi, S. Y. Park and N. E. Lee, *ACS Appl. Mater. Interfaces*, 2019, **11**, 2317-2327.
- 3 D. H. Ho, Q. Sun, S. Y. Kim, J. T. Han, D. H. Kim and J. H. Cho, *Adv. Mater.*, 2016, **28**, 2601-2608.
- 4 T. Vuorinen, J. Niittynen, T. Kankkunen, T. M. Kraft and M. Mantysalo, *Sci. Rep.*, 2016, **6**, 35289.
- 5 G. Y. Bae, J. T. Han, G. Lee, S. Lee, S. W. Kim, S. Park, J. Kwon, S. Jung and K. Cho, *Adv. Mater.*, 2018, **30**, e1803388.
- 6 G. Liu, Q. Tan, H. Kou, L. Zhang, J. Wang, W. Lv, H. Dong and J. Xiong, *Sensors*, 2018, **18**
- 7 Q. Liu, H. Tai, Z. Yuan, Y. Zhou, Y. Su and Y. Jiang, *Adv. Mater. Technol.*, 2019, **4**
- 8 G. Zu, K. Kanamori, K. Nakanishi and J. Huang, *Chem. Mater.*, 2019, **31**, 6276-6285.
- 9 X. Gong, L. Zhang, Y. Huang, S. Wang, G. Pan and L. Li, *RSC Adv.*, 2020, **10**, 22222-22229.
- 10 X. Hu, M. Tian, T. Xu, X. Sun, B. Sun, C. Sun, X. Liu, X. Zhang and L. Qu, *ACS Nano*, 2020, **14**, 559-567.
- 11 T. Q. Trung, S. Ramasundaram, B. U. Hwang and N. E. Lee, *Adv. Mater.*, 2016, **28**, 502-509.
- 12 S. Harada, K. Kanao, Y. Yamamoto, T. Arie, S. Akita and K. Takei, *ACS Nano*, 2014, **8**, 12851-12857.
- 13 S. Kabiri Ameri, R. Ho, H. Jang, L. Tao, Y. Wang, L. Wang, D. M. Schnyer, D. Akinwande and N. Lu, *ACS Nano*, 2017, **11**, 7634-7641.
- 14 V. Adepu, V. Mattela and P. Sahatiya, *J Mater. Chem. B*, 2021, **9**, 4523-4534.
- 15 S. Zhang, A. Chhetry, M. A. Zahed, S. Sharma, C. Park, S. Yoon and J. Y. Park, *npj Flex. Electron.*, 2022, **6**
- 16 B. W. An, S. Heo, S. Ji, F. Bien and J. U. Park, *Nat. Commun.*, 2018, **9**, 2458.
- 17 D. Y. Youn, U. Jung, M. Naqi, S. J. Choi, M. G. Lee, S. Lee, H. J. Park, I. D. Kim and S. Kim, *ACS Appl. Mater. Interfaces*, 2018, **10**, 44678-44685.
- 18 A. Daus, M. Jaikissoo, A. I. Khan, A. Kumar, R. W. Grady, K. C. Saraswat and E. Pop, *Nano Lett.*, 2022, **22**, 6135-6140.
- 19 A. I. Khan, P. Khakbaz, K. A. Brenner, K. K. H. Smithe, M. J. Mleczko, D. Esseni and E. Pop, *Appl. Phys. Lett.*, 2020, **116**
- 20 Y. Xie, T.-M. Chou, W. Yang, M. He, Y. Zhao, N. Li and Z.-H. Lin, *Semicond. Sci. Technol.*, 2017, **32**
- 21 Y. Lu, J. Wang, J. He, L. Zou, D. Zhao and S. Song, *ACS Appl. Mater. Interfaces*, 2022, **14**, 29250-29260.
- 22 W. Li, M. Xu, J. Gao, X. Zhang, H. Huang, R. Zhao, X. Zhu, Y. Yang, L. Luo, M. Chen, H. Ji, L. Zheng, X. Wang and W. Huang, *Adv. Mater.*, 2023, **35**, e2207447.
